# Supplementary material for: Increased interleukin-6 and macrophage chemoattractant protein-1 are associated with respiratory failure in COVID-19
Source: PubMed Central journal article supplement (PMC7729930; doi:10.1038/s41598-020-78710-7), 2020-12-10

## **Increased Interleukin-6 and Macrophage Chemoattractant Protein-1 are associated with Respiratory Failure in COVID-19**

Marthe Jøntvedt Jørgensen<sup>1,2</sup>, Jan Cato Holter<sup>2,3</sup>, Erik Egeland Christensen<sup>1,2</sup>, Camilla Schjalm<sup>4</sup>, Kristian Tonby<sup>1,2</sup>, Søren Erik Pischke<sup>4,5</sup>, Synne Jenum<sup>1</sup>, Linda G Skeie<sup>1</sup>, Sarah Nur<sup>1</sup>, Andreas Lind<sup>3</sup>, Hanne Opsand<sup>6</sup>, Tone Burvald Enersen<sup>7</sup>, Ragnhild Grøndahl<sup>8</sup>, Anne Hermann<sup>7</sup>, Susanne Dudman<sup>2,3</sup>, Fredrik Muller<sup>2,3</sup>, Thor Ueland<sup>2,9</sup>, Tom Eirik Mollnes<sup>4,10,11</sup> Pål Aukrust<sup>2,9,14</sup>, Lars Heggelund<sup>6,12</sup>, Aleksander Rygh Holten<sup>2,13</sup>, Anne Ma Dyrhol-Riise<sup>1,2</sup>.

### **Online data supplement**

#### **Supplementary figure S1 longitudinal cytokine measurements during hospitalization.**

Cytokines measured in plasma for all patients at day of inclusion (n=30), day 2-5 (n=23) and day 7-10 (n=22) during hospitalization.

A

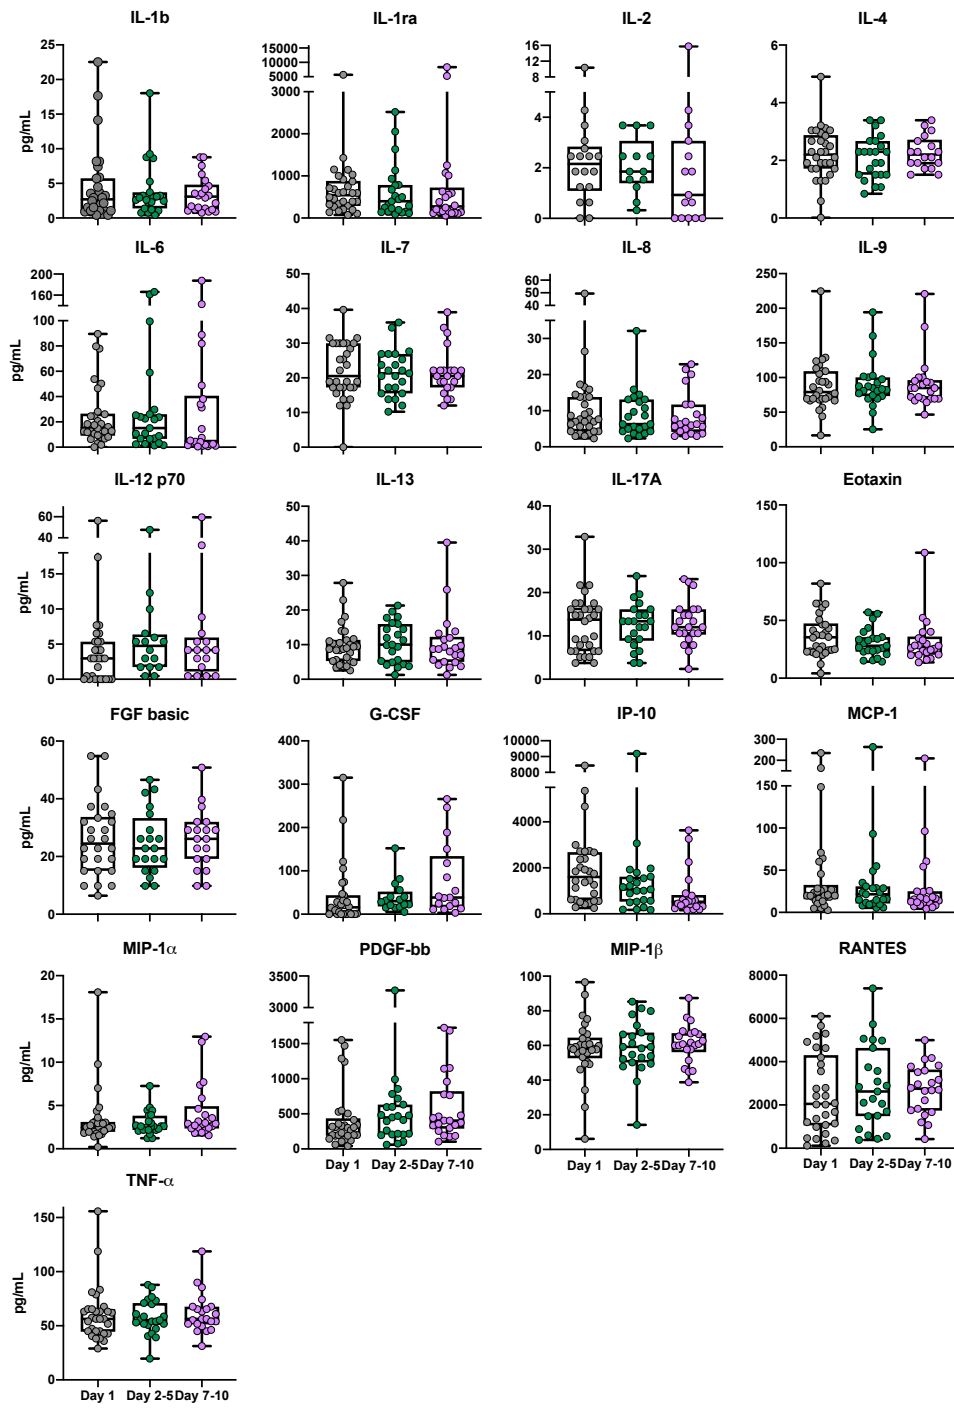

Supplement: 41598_2020_78710_MOESM1_ESM.pdf [file 41598_2020_78710_MOESM1_ESM.pdf]
